# Supplementary material
Source: publisher site journal article supplement (https://www.dovepress.com/article/409398)
Supplement: Supplementary file 1 [file get_supplementary_file.php]

**Supplementary Material Table S1** Questionnaire to measure knowledge, attitudes, barriers, and practice on prevention and control of healthcare-associated infections

| NO. | Items | Sources |
| --- | --- | --- |
| Knowledge | | |
| K1 | Indwelling catheter (e.g. Urinary catheter, Venous catheter) increase the risk of developing healthcare-associated infections (HCAIs) | Cutinho MC, Sheilini M, Harish B11 |
| K2 | The environment (air, surfaces, water) is the major source of bacteria causing HCAIs | Dramowski A, Whitelaw A, Cotton MF21 |
| K3 | HCAIs are infections occurring after at least 7 consecutive days in hospital | Dramowski A, Whitelaw A, Cotton MF21 |
| K4 | Adequate hand hygiene can be achieved using alcohol hand rub instead of soap and water | Dramowski A, Whitelaw A, Cotton MF21 |
| K5 | Care bundles can be used to reduce the risk of device-associated infections | Dramowski A, Whitelaw A, Cotton MF21 |
| Attitudes | | |
| A1 | I believe bundle care conducted in our hospital can effectively reduce risk of acquiring HCAIs | Parmeggiani C, Abbate R, Marinelli P, Angelillo IF22 |
| A2 | I believe hands hygiene measures reduce the risk of HCAIs among medical professionals | Parmeggiani C, Abbate R, Marinelli P, Angelillo IF22 |
| A3 | I believe HCWs who do not perform hand hygiene or ignore IPC recommendations should be reprimanded | Dramowski A, Whitelaw A, Cotton MF21 |
| A4 | I believe I am able to implement IPC measures | Researchers themselves |
| A5 | I believe I have received adequate training about HCAIs as a student | Dramowski A, Whitelaw A, Cotton MF21 |
| Barriers | | |
| B1 | Time constraints | Ogoina D, Pondei K, Adetunji B, Chima G, Isichei C, Gidado S23  Cabana MD, Rand CS, Powe NR, et al20 |
| B2 | Excess workload | Ogoina D, Pondei K, Adetunji B, Chima G, Isichei C, Gidado S23 |
| B3 | Lack of adequate facilities or resources | Ogoina D, Pondei K, Adetunji B, Chima G, Isichei C, Gidado S23  Cabana MD, Rand CS, Powe NR, et al20 |
| B4 | Lack of functional infection control committee | Ogoina D, Pondei K, Adetunji B, Chima G, Isichei C, Gidado S23 |
| B5 | Absence of regular training on infection control | Ogoina D, Pondei K, Adetunji B, Chima G, Isichei C, Gidado S23 |

**Supplementary Material Table S1** (Continued).

| NO. | Items | Sources |
| --- | --- | --- |
| B6 | Lack of knowledge of standard precautions | Ogoina D, Pondei K, Adetunji B, Chima G, Isichei C, Gidado S23  Cabana MD, Rand CS, Powe NR, et al20 |
| Practice | | |
| P1 | Hand hygiene before patient contact | World Health Organization24  Wałaszek M, Kołpa M, Wolak Z, Różańska A, Wójkowska-Mach J25 |
| P2 | Hand hygiene before an aseptic task | World Health Organization24  Wałaszek M, Kołpa M, Wolak Z, Różańska A, Wójkowska-Mach J25 |
| P3 | Hand hygiene after body fluid exposure risk | World Health Organization24  Wałaszek M, Kołpa M, Wolak Z, Różańska A, Wójkowska-Mach J25 |
| P4 | Hand hygiene after patient contact | World Health Organization24  Wałaszek M, Kołpa M, Wolak Z, Różańska A, Wójkowska-Mach J25 |
| P5 | Hand hygiene after contact with patient surroundings | World Health Organization24  Wałaszek M, Kołpa M, Wolak Z, Różańska A, Wójkowska-Mach J25 |
| P6 | Wearing gloves when in direct contact with a patient | Parmeggiani C, Abbate R, Marinelli P, Angelillo IF22 |
| P7 | Hand hygiene before going to another patient | Parmeggiani C, Abbate R, Marinelli P, Angelillo IF22 |
| P8 | Inform the patient (family) how to prevent and control HCAIs | Researchers themselves |
| P9 | Disinfection after using medical instruments | Researchers themselves |

**Notes:** Three items (A4, P8, P9) were developed by researchers themselves, in conjunction with actual situation of the surveyed hospital.
